# Supplementary material for: Silicon nanocrystal hybrid photovoltaic devices for indoor light energy harvesting
Source: Royal Society of Chemistry journal article supplement (doi:10.1039/d0ra00804d), 2020-01-01
Supplement: d0ra00804d1.pdf [file d0ra00804d1.pdf]

Electronic supplementary information of  
**Silicon nanocrystal hybrid photovoltaic devices  
for indoor light energy harvesting**

Munehika Otsuka <sup>a</sup>, Yuki Kurokawa <sup>b</sup>, Yi Ding <sup>c</sup>, Firman Bagja Juangsa <sup>d</sup>,  
Shogo Shibata <sup>a</sup>, Takehito Kato <sup>b</sup>, Tomohiro Nozaki <sup>a, \*</sup>

<sup>a</sup> School of Engineering, Tokyo Institute of Technology, 2-12-1 O-okayama,  
Meguro-ku, Tokyo, 152-8550, Japan

<sup>b</sup> Department of Mechanical Engineering, National Institute of Technology,  
Oyama College, 771 Nakakuki, Oyama, Tochigi, 323-0806, Japan

<sup>c</sup> Institute of Photoelectronic Thin Film Devices and Technology, Nankai  
University, Tianjin 300071, PR China

<sup>d</sup> Faculty of Mechanical and Aerospace Engineering, Institut Teknologi  
Bandung, Ganesha street no. 10, Bandung, 40132, Indonesia

\* E-mail: [nozaki.t.ab@m.titech.ac.jp](mailto:nozaki.t.ab@m.titech.ac.jp)

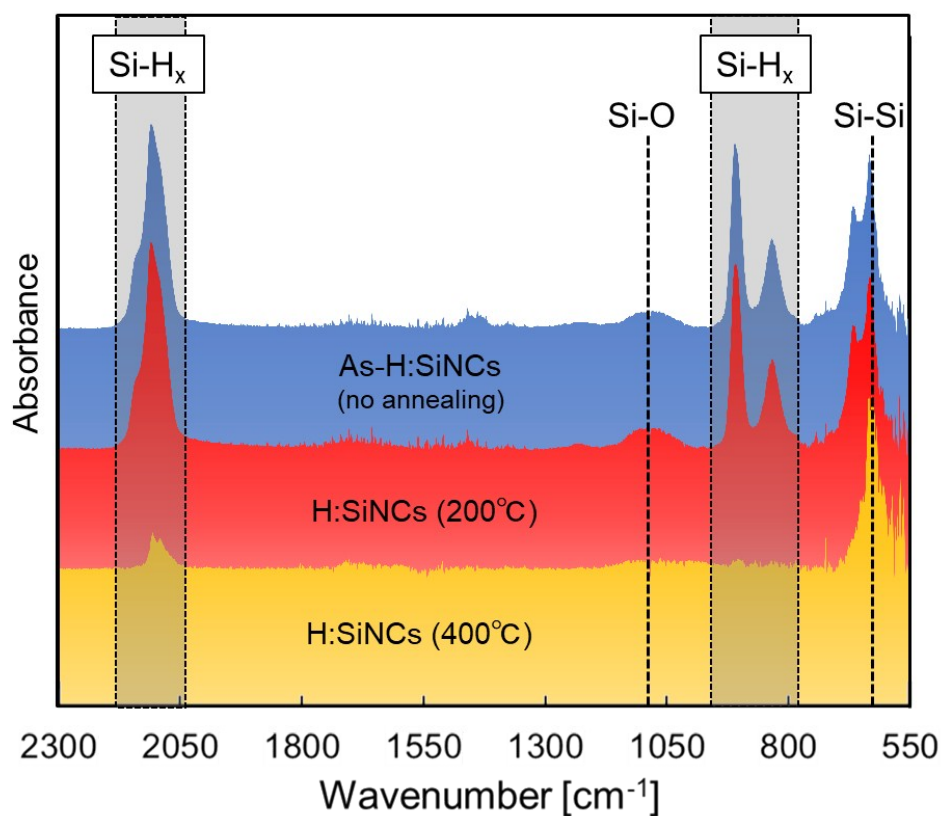

Figure S1. FTIR spectra of SiNCs before and after thermal annealing; as-H:SiNCs (no annealing), H:SiNCs (200 °C for 1 hour) and H:SiNCs (200 °C for 1 hour)

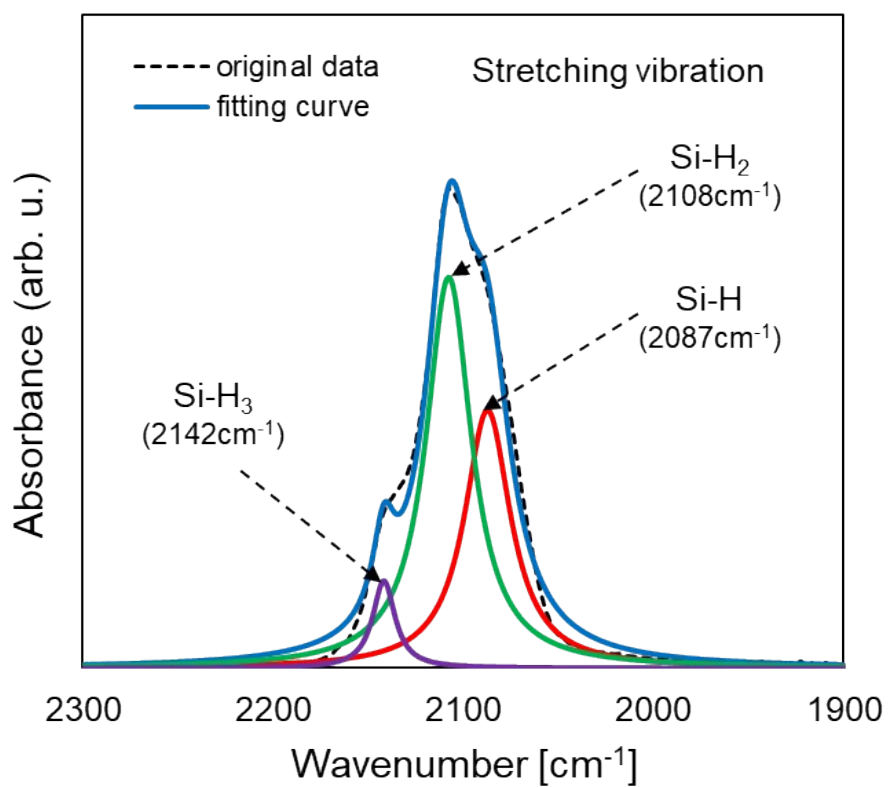

Figure S2. Deconvolution of SiH<sub>n</sub> bonds on the as-H:SiNC (no annealing) surface
